# Supplementary material for: Facile synthesis of hollow Cu2Sb@C core–shell nanoparticles as a superior anode material for lithium ion batteries
Source: Royal Society of Chemistry journal article supplement (doi:10.1039/c1jm13891j), 2011-01-01
Supplement: c1jm13891j.pdf [file c1jm13891j.pdf]

## Supplementary Information

# Facile synthesis of hollow $\text{Cu}_2\text{Sb}@C$ core-shell nanoparticles as a superior anode material for lithium ion batteries

Yang He,<sup>a</sup> Ling Huang,<sup>\*a</sup> Xue Li,<sup>a</sup> Yao Xiao,<sup>a</sup> Gui-Liang Xu,<sup>a</sup> Jun-Tao Li<sup>b</sup> and Shi-Gang Sun<sup>\*a</sup>

5

<sup>a</sup> Department of Chemistry, College of Chemistry and Chemical Engineering, State Key Laboratory of Physical Chemistry of Solid Surfaces,<sup>b</sup>

School of Energy Research, Xiamen University, Xiamen, 361005, China.

E-mail : [huangl@xmu.edu.cn](mailto:huangl@xmu.edu.cn); [sgsun@xmu.edu.cn](mailto:sgsun@xmu.edu.cn)

## 10 Experimental Sections

### Preparation of hollow $\text{Cu}_2\text{Sb}@C$ core-shell nanoparticles

All chemicals were used as received without further purification. Triethylene glycol (TEG, 99%, Alfa) was used as the solvent in all the experiment. Antimony chloride hydrate ( $\text{SbCl}_3 \cdot 5\text{H}_2\text{O}$ , 98%), copper chloride hydrate ( $\text{CuCl}_2 \cdot 2\text{H}_2\text{O}$ , 99%), and sodium borohydride ( $\text{NaBH}_4$ , 98%) were analytical 15 reagents purchased from the Shanghai Chemical Company. Polyvinylpyrrolidone (PVP, MW = 360 000, Aldrich) and poly-(2-ethyl-2-oxazoline) (PEtOx, MW = 50 000, Alfa) as surface stabilizers, while sucrose ( $\text{C}_{12}\text{H}_{22}\text{O}_{11}$ , Shanghai) was used as carbon source.

In this study, we dissolved 2.0 g of PVP and PEtOx (0.45 g) in 100 mL of TEG. When the temperature reached 90°C,  $\text{SbCl}_3$  (2.772 g in 84 mL of TEG) was added. Ten minutes later,  $\text{NaBH}_4$  20 (2.772 g in 84 mL of TEG) was added into solution drop by drop. After the  $\text{NaBH}_4$  solution was added, the black Sb colloids were observed immediately. Twice the amount of the  $\text{NaBH}_4$  was used to ensure complete reduction of the metal ions. This mixed solution was stirred for 0.5 h under an Ar atmosphere and then heated to 170°C, at which  $\text{CuCl}_2$  (2.772 g in 84 mL of TEG) was added dropwise. The temperature was kept constant for 1 h. After that, the solution was adjusted to 200°C and added 25 sucrose (0.8g) into it. The solution was stirred vigorously for 2 h under an Ar atmosphere. The nanoscale carbon-coated Sb-Cu alloy nanoparticles were finally prepared, using sucrose as a carbon source.

### Characterization of hollow $\text{Cu}_2\text{Sb}@C$ core-shell nanoparticles

S-4800 SEM system was applied to observe the surface morphology of the nanocomposites. High 30 resolution transmission electron microscope (HRTEM) images were obtained from a Tecnai F30 microscope. The phase structure of the as-prepared  $\text{Cu}_2\text{Sb}@C$  nanocomposites was determined by X-

ray diffraction (XRD, Philips X' Pert Pro Super X-ray diffractometer Cu-K $\alpha$  radiation) at a scanning rate of 0.02°/s in 2 $\theta$  range from 20° to 80°. Raman experiments were performed on LabRam I (Dilor, France) using 632.8 nm excitation line from a He–Ne laser with a laser power about 1.2 mW on the sample surface.

5

### Electrochemical testing of hollow Cu<sub>2</sub>Sb@C core-shell nanoparticles

The electrodes of hollow Cu<sub>2</sub>Sb @C core-shell nanoparticles were prepared by dispersing 90% active material, and 10% polyacrylic latex binder (LA132) in water solvent to form a homogeneous slurry. The slurry was spread onto a copper foil. The electrodes were dried at 100 °C in a vacuum oven 10 for 12 h and then pressed to enhance the contact between the active materials and the current collector.

The coin-type cell (size 2025) was made from Cu<sub>2</sub>Sb @C nanocomposites cathode and a lithium anode. The electrodes were separated by a separator material (Celgard 2400). The electrolyte reservoir was made from LiPF<sub>6</sub> (1M) in a mixture of ethylene carbonate (EC) / dimethyl carbonate (DMC) / diethyl carbonate (DEC) 1:1:1 (vol%, Provided by Guangzhou Tinci Materials Technology Co., Ltd, 15 Guangzhou, China). The cells were galvanostatically charged and discharged in a battery test system (NEWARE BTS-610, Neware Technology Co., Ltd., China) with a current density of 100 mA·g<sup>-1</sup> for a cut-off voltage of 0.02–1.5 V (*versus* Li<sup>+</sup>/Li) at room temperature.

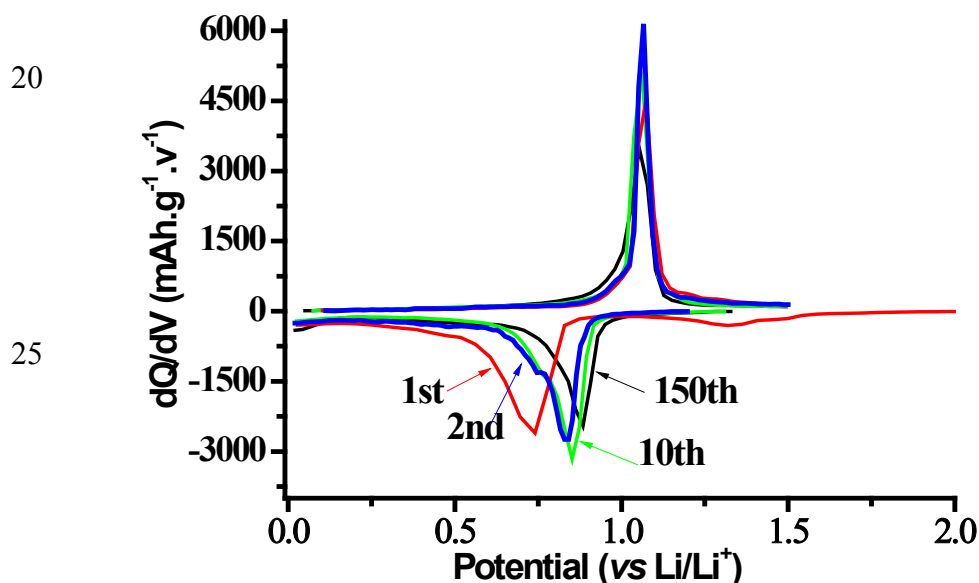

30

Figure S1 Differential charge-discharge capacity vs. voltage profiles of hollow Cu<sub>2</sub>Sb@C nanoparticles electrode

Figure S1 shows the differential charge-discharge capacity vs. voltage profiles of hollow SbCu@C core-shell nanoparticle, in the first cycle, two cathodic peaks are observed at about 0.75 V and 1.5 V, respectively attributed to Li-insertion reaction of  $\text{Cu}_2\text{Sb}$  to  $\text{Li}_3\text{Sb}$  and SEI formation reaction. However, the first cycle profile only give one anode peak at 1.1 V, corresponding to the Li-extraction reaction of  $5\text{Li}_3\text{Sb}$  to  $\text{Cu}_2\text{Sb}$ . During the subsequent cycles, the peak at 0.75V shows a positive shifts, which is ascribed to polarization of the electrode materials in the first cycle. To be noticed, however, that, contrary to the two step deintercalation of lithium of  $\text{Cu}_2\text{Sb}$  nanoparticles, the hollow  $\text{Cu}_2\text{Sb}@C$  core-shell composite show only a step reaction, probably caused by inner low dimensional  $\text{Cu}_2\text{Sb}$  (few nms) and the high conductivity of carbon layer, which also can prevent the  $\text{Cu}_2\text{Sb}$  conglomerating to big size 10particle.

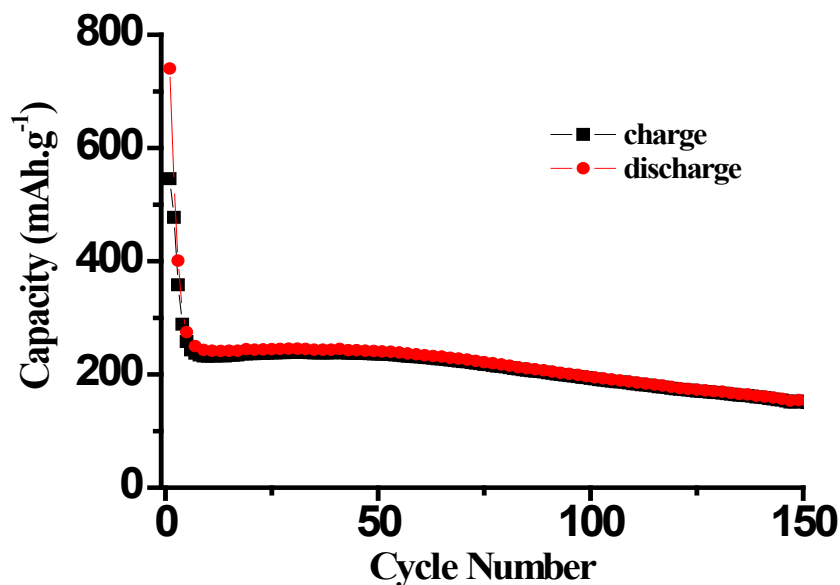

Figure S2 Electrochemical performance of Sb@C nanoparticles
